# Supplementary material for: A high throughput molecular force assay for protein–DNA interactions
Source: Royal Society of Chemistry journal article supplement (doi:10.1039/c0lc00302f), 2011-01-01
Supplement: c0lc00302f.pdf [file c0lc00302f.pdf]

## Supporting Material

### DNA Chip (Immobilization of MFPs on Slides , bottom surface)

DNA oligomers **1**, **2**, and **3** were purchased HPLC grade from IBA GmbH (Goettingen, Germany). Sequences and modifications of all oligonucleotides are the following: shear geometry: **1<sub>s</sub>**, NH<sub>2</sub>-(HEGL)<sub>5</sub>-5'-(T)<sub>10</sub>-CTG CAG GAA TTC GAT ATC AAG CTT ATC GAT-3'; **2<sub>s</sub>**, 3'-GAC GTC CTT AAG CTA TAG TTC GAA TAG CTA C-(T)<sub>7</sub>-5'-5'-T(Cy5)-(T)<sub>7</sub>-C GAC GTC CTT AAG CTA TAG TTC GAA TAG CTA-3'; **3<sub>s</sub>**, biotin-5'-(T)<sub>10</sub>-TAG CTA TTC GAA CTA TAG CTT AAG GAC GTC(Cy3)-3'. Zipper geometry: **1<sub>z</sub>**, 5'-CTG CAG GAA TTC GAT ATC AAG CTT ATC GAT-(T)<sub>10</sub>-(HEGL)<sub>5</sub>-NH<sub>2</sub>-3'; **2<sub>z</sub>**, 5'-GAC GTC CTT AAG CTA TAG TTC GAA TAG CTA C-(T)<sub>7</sub>-T(Cy5)-(T)<sub>8</sub>-C ATC GAT AAG CTT GAT ATC GAA TTC CTG CAG-3'; **3<sub>z</sub>**, biotin-5'-(T)<sub>10</sub>-TAG CTA TTC GAA CTA TAG CTT AAG GAC GTC(Cy3)-3'. The five hexaethyleneglycol (HEGL) linkers are connected via phosphate groups. DNA oligomer **1** is amine-modified, which allows covalent linkage to aldehyde-functionalized glass slides (Schott GmbH, Jena, Germany). We spotted 1 µL drops of 5× SSC (saline sodium citrate; Sigma-Aldrich GmbH, Munich, Germany) containing 25 µM oligomer **1** on the aldehyde slide in a 4 × 4 pattern and incubated the slide in a saturated NaCl ddH<sub>2</sub>O atmosphere overnight. After washing the slide with ddH<sub>2</sub>O containing 0.2% sodium dodecyl sulfate (SDS; VWR Scientific GmbH, Darmstadt, Germany) and thoroughly rinsing the slide with ddH<sub>2</sub>O we reduced the resulting Schiff bases with 1% aqueous NaBH<sub>4</sub> (VWR Scientific GmbH, Darmstadt, Germany) for 90 min. Subsequently, the slide was washed with 1× SSC and thoroughly rinsed with ddH<sub>2</sub>O. In order to reduce nonspecific binding, the slides were blocked in 1× SSC containing 4% bovine serum albumin (BSA; Sigma-Aldrich GmbH, Munich, Germany) for 20 min. Custom-made 16-well silicone isolators (Grace-Biolabs, OR) were placed on top of the immobilized DNA oligomer **1**. The 100 nM Cy5-modified oligomer **2** and 200 nM biotin-modified oligomer **3** were hybridized to the latter for 30 min, completing the **1 · 2 · 3** complex on the glass slide. After removing the silicone isolators the slides were washed with a self-made fluidic system driven by a multi-channel peristaltic pump (Ismatec GmbH, Wertheim-Mondfeld, Germany) to remove any unspecific bound DNA oligomers. The 4 × 4 pattern was rinsed subsequently with 2× SSC, 0.2× SSC containing 0.1% Tween 20 (VWR Scientific GmbH, Darmstadt, Germany) and 1× PBS each with 50 ml in 5 min.

## PDMS stamp (Top Surface)

The stamp is made of polydimethylsiloxane (PDMS) and is fabricated as detailed previously with some modifications.<sup>1</sup> PDMS stamps are fabricated by casting 10:1 (base/crosslinker) (Sylgard, Dow Corning, MI) into a custom-made micro- and millistructured silicon wafer (HSG-IMIT, Villingen-Schwenningen, Germany).<sup>2</sup> After curing was complete, the PDMS was taken out of the mold and cut into a 4 × 4 pillar arrangement. Each pillar is 1 mm diameter, is 1 mm high, and carries a microstructure on the flat surface: 100 mm × 100 mm pads are separated by 41 mm wide and 5 mm deep trenches allowing for liquid drainage during the contact and separation process. Free polymers were extracted in toluene for at least one day.<sup>3</sup> The PDMS was activated overnight in 12.5% hydrochloric acid and subsequently derivatized with (3-glycidoxypropyl)-trimethoxysilane (ABCRC, Karlsruhe, Germany) to generate epoxide groups. NH<sub>2</sub>-PEG-Biotin (3400 g/mol; Rapp Polymere, Tuebingen, Germany) was melted at 80°C, and ~1 mL was spotted on each pillar followed by overnight incubation in argon atmosphere at 80°C. The excess polymers were thoroughly removed with ddH<sub>2</sub>O. Shortly before the experiment, the PDMS was incubated with 1 mg/mL streptavidin (Thermo Fisher Scientific, Bonn, Germany) in 1× PBS and 0.4% bovine serum albumin for 60 min, washed with 1× PBS containing 0.1% Tween 20, with 1× PBS and gently dried with N<sub>2</sub> gas.

## References

1. D. Ho, C. Dose, C. H. Albrecht, P. Severin, K. Falter, P. B. Dervan and H. E. Gaub, *Biophys J*, 2009, **96**, 4661-4671.
2. C. H. Albrecht, H. Clausen-Schaumann and H. E. Gaub, *Journal of Physics: Condensed Matter*, 2006, **18**, 581-599.
3. S. Perutz, E. Kramer, J. Baney and C. Hui, *Macromolecules*, 1997, **30**, 7964-7969.
